# Supplementary material for: Living systematic review and comprehensive network meta-analysis of ALS clinical trials: study protocol
Source: HighWire-hosted journal article supplement (doi:10.1136/bmjopen-2024-087970), 2024-10-01
Supplement: bmjopen-2024-087970supp001_data_supplement.pdf [file bmjopen-2024-087970supp001_data_supplement.pdf]

1 Supplemental data

2 **Table I:** Search strings for PubMed, Embase, and trial registries search

| Database      | PubMed                                                                                                                                                                                                                                                                                                                                                              | Embase                                                                                                                                                                                                                                                                                                                                                            | Trial registries                                                                                                                                |
|---------------|---------------------------------------------------------------------------------------------------------------------------------------------------------------------------------------------------------------------------------------------------------------------------------------------------------------------------------------------------------------------|-------------------------------------------------------------------------------------------------------------------------------------------------------------------------------------------------------------------------------------------------------------------------------------------------------------------------------------------------------------------|-------------------------------------------------------------------------------------------------------------------------------------------------|
| Search string | (“Amyotrophic Lateral Sclerosis”[Mesh] OR “Motor Neuron Disease”[Mesh] OR “ALS”[TIAB] OR “amyotrophic lateral sclerosis”[TIAB] OR “Gehrig*”[TIAB] OR “Motor Neuron Disease*”[TIAB] OR “Charcot*”[TIAB] OR “MND”[TIAB] AND (1999/1/1:2023/01/01[pdat])) AND (“Clinical Trials as Topic”[Mesh] OR “trial*”[TIAB] OR “randomi*”[TIAB] AND (1999/1/1:2024/01/01[pdat])) | (‘amyotrophic lateral sclerosis’/exp OR ‘motor neuron disease’/exp OR ‘als’:ti,ab,kw OR ‘amytrophic lateral sclerosis’:ti,ab,kw OR ‘gehrig*’:ti,ab,kw OR ‘motor neuron disease*’:ti,ab,kw OR ‘charcot*’:ti,ab,kw) AND (‘clinical trial’/exp OR ‘trial*’:ti,ab,kw OR ‘randomi*’:ti,ab,kw) AND [1999-2023]/py AND [embase]/lim NOT ([embase]/lim AND [medline]/lim) | ALS<br>\\(Amyotrophic Lateral Sclerosis\\)   Completed, Terminated studies   Interventional studies   Study start from 01/01/1999 to 01/01/2024 |

4 **Table II:** Preselected studies used for ASReview

| Eligible studies                                                                                                                                                              | Ineligible studies                                                                                                                                                                        |
|-------------------------------------------------------------------------------------------------------------------------------------------------------------------------------|-------------------------------------------------------------------------------------------------------------------------------------------------------------------------------------------|
| 1. “Trial of Sodium Phenylbutyrate-Taurursodiol for Amyotrophic Lateral Sclerosis” (2020, NEJM)<br>2. “Trial of celecoxib in amyotrophic lateral sclerosis” (2006, Neurology) | 1. “Genetic variation in APOE, GRN, and TP53 are phenotype modifiers in frontotemporal dementia” (2020, Neurobiology of Aging)<br>2. “MTBVAC vaccine mediates immune response through the |

|                                                                                                                                                                                                  |                                                                                         |
|--------------------------------------------------------------------------------------------------------------------------------------------------------------------------------------------------|-----------------------------------------------------------------------------------------|
| 3. “Dexpramipexole versus placebo for patients with amyotrophic lateral sclerosis (EMPOWER): a randomised, double-blind, phase 3 trial” (2013, The Lancet Neurology)                             | upregulation of T-regulatory cells in an ALS mouse model” (2021, Cell Reports Medicine) |
| 4. “Efficacy and safety of CNM-Au8 in amyotrophic lateral sclerosis (RESCUE-ALS study): a phase 2, randomised, double-blind, placebo-controlled trial and open label extension” (2023, Elsevier) |                                                                                         |
| 5. “Efficacy of minocycline in patients with amyotrophic lateral sclerosis: a phase III randomized trial” (2007, The Lancet Neurology)                                                           |                                                                                         |
| 6. “A randomized, placebo-controlled trial of topiramate in amyotrophic lateral sclerosis” (2003, Neurology)                                                                                     |                                                                                         |

5

6   **Table III:** IPD variables

| Individual patient data variables                                                                                                                                                                                                                                                                                                                                                                                                                |
|--------------------------------------------------------------------------------------------------------------------------------------------------------------------------------------------------------------------------------------------------------------------------------------------------------------------------------------------------------------------------------------------------------------------------------------------------|
| <ul style="list-style-type: none"><li>• Study information<ul style="list-style-type: none"><li>○ Study ID</li><li>○ Country</li></ul></li><li>• Patient data<ul style="list-style-type: none"><li>○ Patient ID</li><li>○ Age (years)</li><li>○ Sex (male/female)</li><li>○ Height (cm)</li><li>○ Weight (kg)</li><li>○ Site of onset (bulbar/spinal)</li><li>○ Symptom duration (months)</li><li>○ Diagnostic delay (months)</li></ul></li></ul> |

- Intervention data
  - Treatment group
  - Mode of administration
  - Follow-up duration (months)
- Longitudinal
  - ALSFRS-R total
  - ALSFRS-R items (1-12)
  - ALSFRS-R date
  - Predicted VC (%)
  - VC (liter)
  - VC date
- Time-to-event data
  - Death or composite survival endpoint (days)
  - Censor if not deceased (days)
  - Dropout (days)

8    **Table IV:** AD variables

| Aggregate-level data variables                                                                                                                                                                                                                                                                                                                                                                                                                                                                                                                                                                                                                                                                                                                                                                           | Variable name                                                                                                                                                                                                                                                                                                                                                                             |
|----------------------------------------------------------------------------------------------------------------------------------------------------------------------------------------------------------------------------------------------------------------------------------------------------------------------------------------------------------------------------------------------------------------------------------------------------------------------------------------------------------------------------------------------------------------------------------------------------------------------------------------------------------------------------------------------------------------------------------------------------------------------------------------------------------|-------------------------------------------------------------------------------------------------------------------------------------------------------------------------------------------------------------------------------------------------------------------------------------------------------------------------------------------------------------------------------------------|
| <b>General information</b> <ul style="list-style-type: none"><li>• First author</li><li>• Year</li><li>• PMID</li><li>• Title</li><li>• DOI</li><li>• Country</li><li>• Sponsor</li></ul>                                                                                                                                                                                                                                                                                                                                                                                                                                                                                                                                                                                                                | <b>General information</b> <ul style="list-style-type: none"><li>• AUTHOR</li><li>• YEAR</li><li>• PMID</li><li>• TITLE</li><li>• DOI</li><li>• COUNTRY</li><li>• SPONSOR</li></ul>                                                                                                                                                                                                       |
| <b>Baseline data (for each treatment group)</b> <ul style="list-style-type: none"><li>• Group size</li><li>• Age (mean yrs at enrollment)</li><li>• Standard deviation age</li><li>• Sex (% male)</li><li>• Weight (mean kg)</li><li>• Standard deviation weight</li><li>• BMI</li><li>• Standard deviation BMI</li><li>• Site of onset (% bulbar)</li><li>• Symptom duration (mean months)</li><li>• Standard deviation symptom duration</li><li>• Diagnostic delay (mean months)</li><li>• Standard deviation diagnostic delay</li><li>• Diagnostic duration (mean months)</li><li>• Standard deviation diagnostic duration</li><li>• Riluzole use at enrollment</li><li>• ALSFRS-R total score (at baseline)</li><li>• Standard deviation total score</li><li>• VC (%predicted) at baseline</li></ul> | <b>Baseline data</b> <ul style="list-style-type: none"><li>• N</li><li>• AGE</li><li>• AGE_SD</li><li>• SEX</li><li>• WEIGHT</li><li>• WEIGHT_SD</li><li>• BMI</li><li>• BMI_SD</li><li>• ONSET</li><li>• DISDUR</li><li>• DISDUR_SD</li><li>• DXDELAY</li><li>• DXDELAY_SD</li><li>• DXDUR</li><li>• DXDUR_SD</li><li>• RILUSE</li><li>• TOTAL</li><li>• TOTAL_SD</li><li>• VC</li></ul> |

|                                                                                                                                                                                                                                                                                                                                                                                                                                                                                                                                      |                                                                                                                                                                                                                                                                                                                                                               |
|--------------------------------------------------------------------------------------------------------------------------------------------------------------------------------------------------------------------------------------------------------------------------------------------------------------------------------------------------------------------------------------------------------------------------------------------------------------------------------------------------------------------------------------|---------------------------------------------------------------------------------------------------------------------------------------------------------------------------------------------------------------------------------------------------------------------------------------------------------------------------------------------------------------|
| <ul style="list-style-type: none"><li>• Standard deviation %VC</li><li>• ΔFRS</li><li>• Standard deviation ΔFRS</li></ul>                                                                                                                                                                                                                                                                                                                                                                                                            | <ul style="list-style-type: none"><li>• VC_SD</li><li>• SLOPE</li><li>• SLOPE_SD</li></ul> <p><i>Add [_CON] for control group</i></p> <p><i>Add [_TRT] for treatment group</i></p> <p><i>Add [_TRT2] for second treatment</i></p> <p><i>etc</i></p> <p><i>e.g.: N_CON, N_TRT</i></p>                                                                          |
| <b>Intervention data</b> <ul style="list-style-type: none"><li>• Name intervention (+ dosage)</li><li>• Type of intervention (pharm, cell, suppl)</li><li>• Mode of administration</li><li>• Mechanism of action class</li><li>• Randomization ratio</li><li>• Trial study design</li><li>• Lead-in duration (months)</li><li>• Treatment duration (mean months)</li><li>• Total duration (months)</li></ul>                                                                                                                         | <b>Intervention data</b> <ul style="list-style-type: none"><li>• NAME_INT</li><li>• TYPE_INT</li><li>• ADMIN</li><li>• CLASS</li><li>• RATIO</li><li>• DESIGN</li><li>• DUR_LEAD</li><li>• DUR_TRT</li><li>• DUR_TOT</li></ul>                                                                                                                                |
| <b>Outcome data (for each treatment group)</b> <ul style="list-style-type: none"><li>• Analysis used for outcome</li><li>• Mean ALSFRS-R score (at end of FU)</li><li>• St. error mean ALSFRS-R</li><li>• Mean difference ALSFRS-R</li><li>• St. error mean difference ALSFRS-R</li><li>• 95% CI mean difference</li><li>• Comparison arm mean difference</li><li>• Mean ALSFRS-R (monthly) slope</li><li>• St. error mean ALSFRS-R slope</li><li>• Mean difference ALSFRS-R slope</li><li>• Mean difference slope p-value</li></ul> | <b>Outcome data (end of follow-up)</b> <ul style="list-style-type: none"><li>• ANALYSIS</li><li>• FRSR_MEAN</li><li>• FRSR_MEAN_SE</li><li>• FRSR_MEAN_DIFF</li><li>• FRSR_MEAN_DIFF_P</li><li>• FRSR_MEAN_DIFF_CI</li><li>• FRSR_MEAN_DIFF_COMP</li><li>• FRSR_SLOPE</li><li>• FRSR_SLOPE_SE</li><li>• FRSR_SLOPE_DIFF</li><li>• FRSR_SLOPE_DIFF_P</li></ul> |

|                                                                                                                                                                                                                                                                                                                                                                                                                                                                                                                                                                                                                                                                                                                                                                                                                                                                                                                                                                                                                                                                                                                                                                                                                                                                                                |                                                                                                                                                                                                                                                                                                                                                                                                                                                                                                                                                                                                                                                                                                                                                                                                                                                                       |
|------------------------------------------------------------------------------------------------------------------------------------------------------------------------------------------------------------------------------------------------------------------------------------------------------------------------------------------------------------------------------------------------------------------------------------------------------------------------------------------------------------------------------------------------------------------------------------------------------------------------------------------------------------------------------------------------------------------------------------------------------------------------------------------------------------------------------------------------------------------------------------------------------------------------------------------------------------------------------------------------------------------------------------------------------------------------------------------------------------------------------------------------------------------------------------------------------------------------------------------------------------------------------------------------|-----------------------------------------------------------------------------------------------------------------------------------------------------------------------------------------------------------------------------------------------------------------------------------------------------------------------------------------------------------------------------------------------------------------------------------------------------------------------------------------------------------------------------------------------------------------------------------------------------------------------------------------------------------------------------------------------------------------------------------------------------------------------------------------------------------------------------------------------------------------------|
| <ul style="list-style-type: none"><li>• 95% CI mean difference slope</li><li>• Comparison arm mean difference slope</li><li>• ALSFRS-R change from baseline (CFB)</li><li>• ALSFRS-R CFB p-value</li><li>• ALSFRS-R CFB 95% CI</li><li>• Comparison arm ALSFRS-R CFB</li><li>• ALSFRS-R CFB timeframe (months)</li><li>• Adjusted variables in ALSFRS-R analysis</li><li>• N of ALSFRS-R in analysis</li><li>• Mean VC (at end FU)</li><li>• St. error mean VC</li><li>• Mean difference VC</li><li>• St. error mean difference VC</li><li>• 95% CI mean difference VC</li><li>• Comparison arm mean difference VC</li><li>• Mean VC (monthly) slope</li><li>• St. error mean VC slope</li><li>• Mean difference VC slope</li><li>• Mean difference VC slope p-value</li><li>• 95% CI mean difference slope</li><li>• Comparison arm mean difference slope</li><li>• Adjustment variables in FVC analysis</li><li>• N of VC in analysis</li><li>• <b>Survival:</b><ul style="list-style-type: none"><li>○ Mean hazard ratio</li><li>○ St. error hazard ratio</li><li>○ 95% CI hazard ratio</li><li>○ Hazard ratio p-value</li><li>○ Comparison arm hazard ratio</li></ul></li><li>• <b>Drop-outs:</b><ul style="list-style-type: none"><li>○ Death</li><li>○ Adverse event</li></ul></li></ul> | <ul style="list-style-type: none"><li>• FRSR_SLOPE_DIFF_CI</li><li>• FRSR_SLOPE_DIFF_COMP</li><li>• FRSR_CFB</li><li>• FRSR_CFB_P</li><li>• FRSR_CFB_CI</li><li>• FRSR_CFB_COMP</li><li>• FRSR_CFB_TIME</li><li>• ADJUST</li><li>• N_FU</li><li>• VC_MEAN</li><li>• VC_MEAN_SE</li><li>• VC_MEAN_DIFF</li><li>• VC_MEAN_DIFF_P</li><li>• VC_MEAN_DIFF_CI</li><li>• VC_MEAN_DIFF_COMP</li><li>• VC_SLOPE</li><li>• VC_SLOPE_SE</li><li>• VC_SLOPE_DIFF</li><li>• VC_SLOPE_DIFF_P</li><li>• VC_SLOPE_DIFF_CI</li><li>• VC_SLOPE_DIFF_COMP</li><li>• VC_ADJUST</li><li>• VC_N_FU</li><li>• <b>Survival:</b><ul style="list-style-type: none"><li>○ SURV_HR</li><li>○ SURV_HR_SE</li><li>○ SURV_HR_CI</li><li>○ SURV_HR_P</li><li>○ SURV_COMP</li></ul></li><li>• <b>Dropout:</b><ul style="list-style-type: none"><li>○ DROP_DEATH</li><li>○ DROP_AE</li></ul></li></ul> |
|------------------------------------------------------------------------------------------------------------------------------------------------------------------------------------------------------------------------------------------------------------------------------------------------------------------------------------------------------------------------------------------------------------------------------------------------------------------------------------------------------------------------------------------------------------------------------------------------------------------------------------------------------------------------------------------------------------------------------------------------------------------------------------------------------------------------------------------------------------------------------------------------------------------------------------------------------------------------------------------------------------------------------------------------------------------------------------------------------------------------------------------------------------------------------------------------------------------------------------------------------------------------------------------------|-----------------------------------------------------------------------------------------------------------------------------------------------------------------------------------------------------------------------------------------------------------------------------------------------------------------------------------------------------------------------------------------------------------------------------------------------------------------------------------------------------------------------------------------------------------------------------------------------------------------------------------------------------------------------------------------------------------------------------------------------------------------------------------------------------------------------------------------------------------------------|

|                                                                                                                                                                                                                                                                                                                                                                                                                                                                                                                                                                                                                                                                                                                                                                                        |                                                                                                                                                                                                                                                                                                                                                                                                                            |
|----------------------------------------------------------------------------------------------------------------------------------------------------------------------------------------------------------------------------------------------------------------------------------------------------------------------------------------------------------------------------------------------------------------------------------------------------------------------------------------------------------------------------------------------------------------------------------------------------------------------------------------------------------------------------------------------------------------------------------------------------------------------------------------|----------------------------------------------------------------------------------------------------------------------------------------------------------------------------------------------------------------------------------------------------------------------------------------------------------------------------------------------------------------------------------------------------------------------------|
| <ul style="list-style-type: none"><li>○ Termination of participation</li><li>○ Disease progression</li><li>○ Other reasons</li><li>• AEs reported</li><li>• SAEs reported</li></ul>                                                                                                                                                                                                                                                                                                                                                                                                                                                                                                                                                                                                    | <ul style="list-style-type: none"><li>○ DROP_TERM</li><li>○ DROP_PROG</li><li>○ DROP_OTHER</li><li>• AE</li><li>• SAE</li></ul> <p><i>Add [_CON] for control group</i></p> <p><i>Add [_TRT] for treatment group</i></p> <p><i>Add [_TRT2] for second treatment</i></p> <p><i>etc</i></p> <p><i>e.g.: N_CON, N_TRT</i></p>                                                                                                  |
| <p><b>Study descriptives</b></p> <ul style="list-style-type: none"><li>• Primary outcome (ALSFRS-R, VC, survival)</li><li>• Protocol published/accessible? (y/n)</li><li>• IPD published/accessible? (y/n)</li><li>• Kaplan-Meier survival curve present? (y/n)</li><li>• ALSFRS-R analysis method mentioned? (y/n)</li><li>• Survival analysis method mentioned? (y/n)</li><li>• Definition of survival event</li><li>• Sample size calculation mentioned (y/n)</li><li>• Placebo arm? (y/n)</li><li>• <b>Outcome reported?</b><ul style="list-style-type: none"><li>○ ALSFRS-R (y/n)</li><li>○ VC (y/n)</li><li>○ Survival (y/n)</li><li>○ Electrophysiology (y/n)</li><li>○ Muscle strength (ISOMETRIC/HHD/MRC) (y/n)</li><li>○ Neurofilament Light Chain (y/n)</li></ul></li></ul> | <p><b>Dummies</b></p> <ul style="list-style-type: none"><li>• OUTCOME</li><li>• PROT_ACC</li><li>• IPD_ACC</li><li>• KAPMEI</li><li>• FRS-R_METH</li><li>• SURV_METH</li><li>• SURV_DEF</li><li>• SAMP_CALC</li><li>• PLACEBO</li><li>• <b>Reported:</b><ul style="list-style-type: none"><li>○ FRS-R_REP</li><li>○ VC_REP</li><li>○ SURV_REP</li><li>○ ELECT_REP</li><li>○ MUSC_REP</li><li>○ NFL_REP</li></ul></li></ul> |

10     **Table V:** variable code list

| Name                                     | Definition                                              | Levels                                |
|------------------------------------------|---------------------------------------------------------|---------------------------------------|
| <b>AUTHOR</b>                            | Name of first author                                    | Nominal                               |
| <b>YEAR</b>                              | Year of publication                                     | Continuous                            |
| <b>PMID</b>                              | PubMed ID of main publication                           | Nominal                               |
| <b>TITLE</b>                             | Title of article                                        | Nominal                               |
| <b>DOI</b>                               | DOI number                                              | Nominal                               |
| <b>COUNTRY</b>                           | Country                                                 | Nominal                               |
| <b>SPONSOR</b>                           | Source of funding                                       | 0 = academic, 1 = industry, 2 = mixed |
| <b>PUB_DATE</b>                          | Publication date                                        | Date                                  |
| <b>N</b> (for all treatment groups)      | Number of participants in treatment group at enrollment | Continuous                            |
| <b>AGE</b> (for all treatment groups)    | Mean age at enrollment                                  | Continuous (years)                    |
| <b>AGE_SD</b>                            | Standard deviation age                                  | Continuous                            |
| <b>SEX</b> (for all treatment groups)    | % of participants that are male                         | % Male                                |
| <b>WEIGHT</b> (for all treatment groups) | Mean weight of participants                             | Continuous (kg)                       |
| <b>WEIGHT_SD</b>                         | Standard deviation weight                               | Continuous                            |
| <b>BMI</b> (for all treatment groups)    | Mean BMI of participants                                | Continuous (kg/m <sup>2</sup> )       |
| <b>BMI_SD</b>                            | Standard deviation BMI                                  | Continuous                            |
| <b>ONSET</b> (for all treatment groups)  | % of participants that have bulbar onset                | % Bulbar onset                        |



|                                            |                                                   |                         |
|--------------------------------------------|---------------------------------------------------|-------------------------|
| <b>DISDUR</b> (for all treatment groups)   | Mean duration of symptoms at enrollment           | Continuous (months)     |
| <b>DISDUR_SD</b>                           | Standard deviation disease duration               | Continuous              |
| <b>DXDELAY</b> (for all treatment groups)  | Mean time from onset to diagnosis                 | Continuous (months)     |
| <b>DXDELAY_SD</b>                          | Standard deviation diagnostic delay               | Continuous              |
| <b>DXDUR</b>                               | Mean time from diagnosis to enrollment            | Continuous (months)     |
| <b>DXDUR_SD</b>                            | Standard deviation diagnostic duration            | Continuous              |
| <b>RILUSE</b> (for all treatment groups)   | % of participants that use riluzole at enrollment | Percentage users        |
| <b>TOTAL</b> (for all treatment groups)    | ALSFRS-R total score at baseline                  | Continuous              |
| <b>TOTAL_SD</b>                            | Standard deviation total score                    | Continuous              |
| <b>VC</b> (for all treatment groups)       | VC (%predicted) at baseline                       | % Of predicted capacity |
| <b>VC_SD</b>                               | Standard deviation VC                             | Continuous              |
| <b>SLOPE</b>                               | Monthly decline of ALSFRS-R at baseline           | Continuous              |
| <b>SLOPE_SD</b>                            | Standard deviation monthly decline                | Continuous              |
| <b>NAME_INT</b> (for all treatment groups) | Name of the treatment                             | Nominal                 |

|                                             |                                                          |                                                                                                                                                    |
|---------------------------------------------|----------------------------------------------------------|----------------------------------------------------------------------------------------------------------------------------------------------------|
| <b>TYPE_INT</b> (for all treatment groups)  | Treatment type                                           | 0 = pharmaceutical, 1 = cell therapy, 2 = supplement                                                                                               |
| <b>GROUP_INT</b> (for all treatment groups) | Subgrouping                                              | <<undefined>>                                                                                                                                      |
| <b>ADMIN</b> (for all treatment groups)     | Mode of administration                                   | 0 = oral, 1 = IV, 2 = intrathecal, 3 = subcutaneous, 4 = intramuscular, 5 = transdermal                                                            |
| <b>CLASS</b> (for all treatment groups)     | Mechanism of action class                                | 0 = miscellaneous, 1 = antioxidants, 2 = cell therapy, 3 = genetic therapy, 4 = mitochondrial dysfunction, 5 = neuroinflammation, 6 = proteostasis |
| <b>RATIO</b>                                | Randomization ratio of intervention:control              | Continuous (ratio)                                                                                                                                 |
| <b>DESIGN</b>                               | Type of study design in trial                            | Nominal                                                                                                                                            |
| <b>DUR_LEAD</b>                             | Lead-in duration, time when enrolled but not yet treated | Continuous (months)                                                                                                                                |
| <b>DUR_TRT</b>                              | Treatment duration                                       | Continuous (months)                                                                                                                                |
| <b>DUR_TOT</b>                              | Total duration of study                                  | Continuous (months)                                                                                                                                |
| <b>ANALYSIS</b>                             | Type of analysis used to determine primary outcome       | Nominal                                                                                                                                            |
| <b>FRSR_MEAN</b> (for all treatment groups) | ALSFRS-R total score at end of follow-up                 | Continuous                                                                                                                                         |

|                                                        |                                                         |                            |
|--------------------------------------------------------|---------------------------------------------------------|----------------------------|
| <b>FRSR_MEAN_SE</b> (for all treatment groups)         | Standard error mean ALSFRS-R total score                | Continuous                 |
| <b>FRSR_MEAN_DIFF</b> (for all treatment groups)       | Mean difference ALSFRS-R total score                    | Continuous                 |
| <b>FRSR_MEAN_DIFF_P</b> (for all treatment groups)     | Mean difference ALSFRS-R total score p-value            | Continuous                 |
| <b>FRSR_MEAN_DIFF_CI</b> (for all treatment groups)    | Mean difference ALSFRS-R total score 95% CI             | [lower bound, upper bound] |
| <b>FRSR_MEAN_DIFF_COMP</b> (for all treatment groups)  | Mean difference ALSFRS-R total score comparison arm     | Nominal                    |
| <b>FRSR_SLOPE</b> (for all treatment groups)           | Mean ALSFRS-R monthly decline                           | Continuous                 |
| <b>FRSR_SLOPE_SE</b> (for all treatment groups)        | Standard error mean ALSFRS-R monthly decline            | Continuous                 |
| <b>FRSR_SLOPE_DIFF</b> (for all treatment groups)      | Mean difference ALSFRS-R monthly decline                | Continuous                 |
| <b>FRSR_SLOPE_DIFF_P</b> (for all treatment groups)    | Mean difference ALSFRS-R monthly decline p-value        | Continuous                 |
| <b>FRSR_SLOPE_DIFF_CI</b> (for all treatment groups)   | Mean difference ALSFRS-R monthly decline 95% CI         | [lower bound, upper bound] |
| <b>FRSR_SLOPE_DIFF_COMP</b> (for all treatment groups) | Mean difference ALSFRS-R monthly decline comparison arm | Nominal                    |
| <b>FRSR_CFB</b> (for all treatment groups)             | Mean ALSFRS-R change from baseline                      | Continuous                 |
| <b>FRSR_CFB_P</b> (for all treatment groups)           | Mean ALSFRS-R change from baseline p-value              | Continuous                 |

|                                                     |                                                                |                            |
|-----------------------------------------------------|----------------------------------------------------------------|----------------------------|
| <b>FRSR_CFB_CI</b> (for all treatment groups)       | Mean ALSFRS-R change from baseline 95% CI                      | [lower bound, upper bound] |
| <b>FRSR_CFB_COMP</b> (for all treatment groups)     | Mean ALSFRS-R change from baseline comparison arm              | Nominal                    |
| <b>FRSR_CFB_TIME</b> (for all treatment groups)     | Mean ALSFRS-R change from baseline timepoint                   | Continuous (months)        |
| <b>ADJUST</b> (for all treatment groups)            | Variables that were used for stratifying or adjusting ALSFRS-R | Nominal                    |
| <b>N_FU</b> (for all treatment groups)              | Number of patients with ALSFRS-R scores used in analysis       | Continuous                 |
| <b>VC_MEAN</b> (for all treatment groups)           | VC % of predicted capacity at end of follow-up                 | % Of predicted capacity    |
| <b>VC_MEAN_SE</b> (for all treatment groups)        | Standard error mean VC                                         | Continuous                 |
| <b>VC_MEAN_DIFF</b> (for all treatment groups)      | Mean difference VC                                             | Continuous                 |
| <b>VC_MEAN_DIFF_P</b> (for all treatment groups)    | Mean difference VC p-value                                     | Continuous                 |
| <b>VC_MEAN_DIFF_CI</b> (for all treatment groups)   | Mean difference VC 95% CI                                      | [lower bound, upper bound] |
| <b>VC_MEAN_DIFF_COMP</b> (for all treatment groups) | Mean difference VC comparison arm                              | Nominal                    |
| <b>VC_SLOPE</b> (for all treatment groups)          | Mean VC monthly decline                                        | % Of predicted capacity    |

|                                                      |                                                          |                            |
|------------------------------------------------------|----------------------------------------------------------|----------------------------|
| <b>VC_SLOPE_SE</b> (for all treatment groups)        | Standard error mean VC monthly decline                   | Continuous                 |
| <b>VC_SLOPE_DIFF</b> (for all treatment groups)      | Mean difference VC monthly decline                       | % Of predicted capacity    |
| <b>VC_SLOPE_DIFF_P</b> (for all treatment groups)    | Mean difference VC monthly decline p-value               | Continuous                 |
| <b>VC_SLOPE_DIFF_CI</b> (for all treatment groups)   | Mean difference VC monthly decline 95% CI                | [lower bound, upper bound] |
| <b>VC_SLOPE_DIFF_COMP</b> (for all treatment groups) | Mean difference VC monthly decline comparison arm        | Nominal                    |
| <b>ADJUST_VC</b> (for all treatment groups)          | Variables that were used for stratifying or adjusting VC | Nominal                    |
| <b>N_FU_VC</b> (for all treatment groups)            | Number of patients with VC scores used in analysis       | Continuous                 |
| <b>SURV_HR</b>                                       | Hazard ratio mean                                        | Continuous                 |
| <b>SURV_HR_SE</b>                                    | Hazard ratio standard error                              | Continuous                 |
| <b>SURV_HR_CI</b>                                    | Hazard ratio 95% confidence interval                     | [lower bound, upper bound] |
| <b>SURV_HR_P</b>                                     | Hazard ratio p-value                                     | Continuous                 |
| <b>SURV_COMP</b>                                     | Hazard ratio comparison arm                              | Nominal                    |
| <b>DROP_DEATH</b> (for all treatment groups)         | Number of drop-outs due to death                         | Continuous                 |
| <b>DROP_AE</b> (for all treatment groups)            | Number of drop-outs due to adverse events                | Continuous                 |
| <b>DROP_TERM</b> (for all treatment groups)          | Number of drop-outs due to terminating participation     | Continuous                 |

|                                              |                                                                       |                 |
|----------------------------------------------|-----------------------------------------------------------------------|-----------------|
| <b>DROP_PROG</b> (for all treatment groups)  | Number of drop-outs due to disease progression                        | Continuous      |
| <b>DROP_OTHER</b> (for all treatment groups) | Number of drop-outs due to other reasons                              | Continuous      |
| <b>AE</b> (for all treatment groups)         | Number of adverse events in group at end of follow-up                 | Continuous      |
| <b>SAE</b> (for all treatment groups)        | Number of serious adverse events in group at end of follow-up         | Continuous      |
| <b>OUTCOME</b>                               | Primary outcome (e.g., ALSFRS-R, survival, safety)                    | Nominal         |
| <b>PLACEBO</b>                               | Is a placebo arm present?                                             | 0 = no, 1 = yes |
| <b>PROT_ACC</b>                              | Is the study protocol accessible?                                     | 0 = no, 1 = yes |
| <b>IPD_ACC</b>                               | Is IPD accessible?                                                    | 0 = no, 1 = yes |
| <b>KAPMEI</b>                                | Are Kaplan-Meier survival curves used?                                | 0 = no, 1 = yes |
| <b>FRSR_METH</b>                             | Method of ALSFRS-R analysis mentioned?                                | 0 = no, 1 = yes |
| <b>SURV_METH</b>                             | Method of survival analysis mentioned?                                | 0 = no, 1 = yes |
| <b>SURV_DEF</b>                              | Definition of an event in survival analysis (death/tracheostomy/etc.) | Nominal         |
| <b>SAMP_CALC</b>                             | Method of sample size calculation mentioned?                          | 0 = no, 1 = yes |

|                  |                                                                |                 |
|------------------|----------------------------------------------------------------|-----------------|
| <b>FRSR_REP</b>  | Is ALSFRS-R reported as outcome?                               | 0 = no, 1 = yes |
| <b>VC_REP</b>    | Is VC reported as outcome?                                     | 0 = no, 1 = yes |
| <b>SURV_REP</b>  | Is survival reported as outcome?                               | 0 = no, 1 = yes |
| <b>ELECT_REP</b> | Is electrophysiology reported as outcome?                      | 0 = no, 1 = yes |
| <b>MUSC_REP</b>  | Is muscle strength reported as outcome?<br>(ISOMETRIC/HHD/MRC) | 0 = no, 1 = yes |
| <b>NFL_REP</b>   | Is neurofilament light chain reported as outcome?              | 0 = no, 1 = yes |
